# Supplementary material for: Identification of altered metabolic functional components using metabolomics to analyze the different ages of fruiting bodies of Sanghuangporus vaninii cultivated on cut log substrates
Source: Front Nutr. 2023 Aug 3;10:1197998. doi: 10.3389/fnut.2023.1197998 (PMC10472941; doi:10.3389/fnut.2023.1197998)
Supplement: Supplementary file 1 [file Table_1.XLSX]

## Sheet: Sheet1
name	CLASS
Pantothenic acid	Alcohol
Fisetin	Alcohol
9(S)-HOT	Alcohol
9(S)-HPOT	Alcohol
(R)-2,3-Dihydroxy-isovalerate	Alcohol
1D-chiro-Inositol	Alcohol
Volemitol	Alcohol
Alprenolol	Alcohol
Shikimic acid	Alcohol
2,3-Butanediol	Alcohol
Isohelenol	Alcohol
Ergosta-5,7,22,24(28)-tetraen-3beta-ol	Alcohol
Nicotinic acid	Alkaloids and derivatives
Acetylcholine	Alkaloids and derivatives
L-Carnitine	Alkaloids and derivatives
Anabasine	Alkaloids and derivatives
Codeinone	Alkaloids and derivatives
(4S,5R)-4,5,6-Trihydroxy-2-iminohexanoate	Amino acids, peptides, and analogues
N6-Acetyl-L-lysine	Amino acids, peptides, and analogues
N-Acetylglutamic acid	Amino acids, peptides, and analogues
Gabapentin	Amino acids, peptides, and analogues
O-Acetyl-L-homoserine	Amino acids, peptides, and analogues
Diaminopimelic acid	Amino acids, peptides, and analogues
Guanidinosuccinic acid	Amino acids, peptides, and analogues
L-Glutamic acid	Amino acids, peptides, and analogues
N-Acetylleucine	Amino acids, peptides, and analogues
Ergothioneine	Amino acids, peptides, and analogues
Glutathione	Amino acids, peptides, and analogues
Se-Methylselenocysteine	Amino acids, peptides, and analogues
N-Acetyl-L-phenylalanine	Amino acids, peptides, and analogues
L-Serine	Amino acids, peptides, and analogues
Leucine	Amino acids, peptides, and analogues
Myriocin	Amino acids, peptides, and analogues
gamma-Aminobutyric acid	Amino acids, peptides, and analogues
L-Norvaline	Amino acids, peptides, and analogues
4,5-Dihydroorotic acid	Amino acids, peptides, and analogues
Ectoine	Amino acids, peptides, and analogues
L-Asparagine	Amino acids, peptides, and analogues
N,N-Diethylglycine	Amino acids, peptides, and analogues
gamma-Glutamyl-beta-aminopropiononitrile	Amino acids, peptides, and analogues
L-Threonine	Amino acids, peptides, and analogues
L-Arginine	Amino acids, peptides, and analogues
Ornithine	Amino acids, peptides, and analogues
Saccharopine	Amino acids, peptides, and analogues
gamma-Glutamylcysteine	Amino acids, peptides, and analogues
L-Tyrosine	Amino acids, peptides, and analogues
L-Dopa	Amino acids, peptides, and analogues
cis-4-Hydroxy-D-proline	Amino acids, peptides, and analogues
Creatinine	Amino acids, peptides, and analogues
D-Ornithine	Amino acids, peptides, and analogues
DL-Glutamate	Amino acids, peptides, and analogues
gamma-L-Glutamyl-L-cysteinyl-beta-alanine	Amino acids, peptides, and analogues
N-Acetyl-L-2-amino-6-oxopimelate	Amino acids, peptides, and analogues
Argininosuccinic acid	Amino acids, peptides, and analogues
L-Aspartic acid	Amino acids, peptides, and analogues
1,5-Naphthalenediamine	Benzenoids
Metoclopramide	Benzenoids
Ortho-Hydroxyphenylacetic acid	Benzenoids
4-Hydroxybenzoic acid	Benzenoids
Phenylacetaldehyde	Benzenoids
Phenylethylamine	Benzenoids
Syringic acid	Benzenoids
Tyramine	Benzenoids
3-O-Methylgallate	Benzenoids
2-Acetamidofluorene	Benzenoids
Nitrobenzene	Benzenoids
Phthalic acid	Benzenoids
Procaine	Benzenoids
Gentisic acid	Benzenoids
2-Phenylethanol	Benzenoids
2-Phenylethyl acetate	Benzenoids
Probenecid	Benzenoids
Dibutyl phthalate	Benzenoids
Trehalose 6-phosphate	Carbohydrates and carbohydrate conjugates
Azacitidine	Carbohydrates and carbohydrate conjugates
Maltotetraose	Carbohydrates and carbohydrate conjugates
Glucosamine 6-phosphate	Carbohydrates and carbohydrate conjugates
L-Arabitol	Carbohydrates and carbohydrate conjugates
Galactitol	Carbohydrates and carbohydrate conjugates
Glucose 6-phosphate	Carbohydrates and carbohydrate conjugates
L-Fucose	Carbohydrates and carbohydrate conjugates
Ribitol	Carbohydrates and carbohydrate conjugates
Mannitol 1-phosphate	Carbohydrates and carbohydrate conjugates
Coniferin	Carbohydrates and carbohydrate conjugates
D-Glucuronic Acid	Carbohydrates and carbohydrate conjugates
N-Acetyl-D-glucosamine	Carbohydrates and carbohydrate conjugates
2-Dehydro-D-glucose	Carbohydrates and carbohydrate conjugates
L-Iditol	Carbohydrates and carbohydrate conjugates
Nicotinamide riboside	Carbohydrates and carbohydrate conjugates
Trehalose	Carbohydrates and carbohydrate conjugates
Glyceric acid	Carbohydrates and carbohydrate conjugates
D-Fructose	Carbohydrates and carbohydrate conjugates
Fructose-1P	Carbohydrates and carbohydrate conjugates
D-Glycero-D-galacto-heptitol	Carbohydrates and carbohydrate conjugates
N-Acetyl-alpha-D-glucosamine	Carbohydrates and carbohydrate conjugates
Mannitol	Carbohydrates and carbohydrate conjugates
D-Xylitol	Carbohydrates and carbohydrate conjugates
1-Kestose	Carbohydrates and carbohydrate conjugates
Juvenile hormone III	Fatty acid esters
4-Hydroxy-2-oxo-heptanedioate	Fatty acid esters
Butyryl-L-carnitine	Fatty acid esters
N(omega)-Nitro-L-arginine methyl ester	Fatty acid esters
15-Keto-prostaglandin F2a	Fatty acids and conjugates
8-HETE	Fatty acids and conjugates
(13E)-11a-Hydroxy-9,15-dioxoprost-13-enoic acid	Fatty acids and conjugates
Itaconic acid	Fatty acids and conjugates
(+)-7-Isojasmonic acid	Fatty acids and conjugates
2,3-Dinor-8-iso prostaglandin F2alpha	Fatty acids and conjugates
Azelaic acid	Fatty acids and conjugates
9,10-12,13-Diepoxyoctadecanoate	Fatty acids and conjugates
Traumatic acid	Fatty acids and conjugates
2,3-Dinor-8-iso prostaglandin F1alpha	Fatty acids and conjugates
Docosahexaenoic acid	Fatty acids and conjugates
Dodecanoic acid	Fatty acids and conjugates
Gamma-Linolenic acid	Fatty acids and conjugates
Dodecanedioic acid	Fatty acids and conjugates
6-Keto-prostaglandin F1alpha	Fatty acids and conjugates
Prostaglandin A1	Fatty acids and conjugates
Succinic acid semialdehyde	Fatty acids and conjugates
Pelargonic acid	Fatty acids and conjugates
Indolepyruvate	Indoles and derivatives
3-Indoleacetonitrile	Indoles and derivatives
N-Acetylserotonin	Indoles and derivatives
Pyrophosphate	Inorganic compounds
Formononetin	Isoflavonoids
Biochanin A	Isoflavonoids
10-Deoxymethynolide	Lactone
(R)-Pantolactone	Lactone
alpha-Santonin	Lactone
Isoalantolactone	Lactone
Pimpinellin	Lactone
Methoprene	Lactone
Alpha-dimorphecolic acid	Lineolic acids and derivatives
13-L-Hydroperoxylinoleic acid	Lineolic acids and derivatives
Alpha-Linolenic acid	Lineolic acids and derivatives
13-OxoODE	Lineolic acids and derivatives
Methyl jasmonate	Lineolic acids and derivatives
11-Dehydro-thromboxane B2	Lipids and lipid-like molecules
9-OxoODE	Lipids and lipid-like molecules
Geranial	Lipids and lipid-like molecules
Trioxilin A3	Lipids and lipid-like molecules
3-Methylindolepyruvate	Lipids and lipid-like molecules
Phytosphingosine	Lipids and lipid-like molecules
Parthenin	Lipids and lipid-like molecules
13(S)-HPOT	Lipids and lipid-like molecules
5-Guanidino-3-methyl-2-oxopentanoate	Lipids and lipid-like molecules
Confertifolin	Lipids and lipid-like molecules
12-OPDA	Lipids and lipid-like molecules
Ubiquinone-1	Lipids and lipid-like molecules
Glycerophosphocholine	Lipids and lipid-like molecules
8-Amino-7-oxononanoate	Lipids and lipid-like molecules
Alantolactone	Lipids and lipid-like molecules
Adenylsuccinic acid	Nucleosides, nucleotides, and analogues
Xanthine	Nucleosides, nucleotides, and analogues
AMP	Nucleosides, nucleotides, and analogues
Dihydrothymine	Nucleosides, nucleotides, and analogues
Niacinamide	Nucleosides, nucleotides, and analogues
Paraxanthine	Nucleosides, nucleotides, and analogues
Uridine	Nucleosides, nucleotides, and analogues
Uric acid	Nucleosides, nucleotides, and analogues
Guanine	Nucleosides, nucleotides, and analogues
Hypoxanthine	Nucleosides, nucleotides, and analogues
N-Butyryl-L-homoserine lactone	Nucleosides, nucleotides, and analogues
Cytidine	Nucleosides, nucleotides, and analogues
Thymidine	Nucleosides, nucleotides, and analogues
3-Methylxanthine	Nucleosides, nucleotides, and analogues
Dihydrouracil	Nucleosides, nucleotides, and analogues
3,5-Dihydroxy-phenylglycine	Nucleosides, nucleotides, and analogues
Riboflavin	Nucleosides, nucleotides, and analogues
Guanosine 2',3'-cyclic phosphate	Nucleosides, nucleotides, and analogues
Inosine	Nucleosides, nucleotides, and analogues
GMP	Nucleosides, nucleotides, and analogues
Guanosine	Nucleosides, nucleotides, and analogues
Cyclic AMP	Nucleosides, nucleotides, and analogues
Theophylline	Nucleosides, nucleotides, and analogues
5-Methyl-2'-deoxycytidine	Nucleosides, nucleotides, and analogues
Deoxyguanosine	Nucleosides, nucleotides, and analogues
dGMP	Nucleosides, nucleotides, and analogues
Ketoleucine	Organic acids and derivatives
Penicillin N	Organic acids and derivatives
Prephenate	Organic acids and derivatives
5-Carboxyvanillic acid	Organic acids and derivatives
10-Hydroxydecanoic acid	Organic acids and derivatives
L-Malic acid	Organic acids and derivatives
2-Hydroxyglutarate	Organic acids and derivatives
O-Phosphoethanolamine	Organic acids and derivatives
Homocitric acid	Organic acids and derivatives
Oxoadipic acid	Organic acids and derivatives
Methylmalonic acid	Organic acids and derivatives
beta-Alanyl-L-lysine	Organic acids and derivatives
2-Hydroxy-6-pentadecylbenzoic acid	Organic acids and derivatives
Caffeate	Organic acids and derivatives
Carboprost	Organic acids and derivatives
3-Methyl-2-oxovaleric acid	Organic acids and derivatives
2-Furoate	Organoheterocyclic compounds
Maltol	Organoheterocyclic compounds
3-Methyl-quinolin-2-ol	Organoheterocyclic compounds
OPEO	Organoheterocyclic compounds
Neocnidilide	Organoheterocyclic compounds
Cerulenin	Organoheterocyclic compounds
N-Nitroso-pyrrolidine	Organoheterocyclic compounds
Demethylated antipyrine	Organoheterocyclic compounds
Myristicin	Organoheterocyclic compounds
6-Methoxymellein	Organoheterocyclic compounds
1-Pyrroline-4-hydroxy-2-carboxylate	Organoheterocyclic compounds
Choline	Organonitrogen compounds
Piplartine	Organooxygen compounds
2',4'-Dihydroxyacetophenone	Organooxygen compounds
2-Heptanone	Organooxygen compounds
trans-Ferulic acid	Organooxygen compounds
5-Hydroxymethyl-2-furancarboxaldehyde	Organooxygen compounds
1,2,3-Trihydroxybenzene	Phenols
2-Naphthol	Phenols
Hydroquinone	Phenols
Homovanillic acid	Phenols
Catechol	Phenols
3,4-Dihydroxymandelic acid	Phenols
Tyrosol	Phenols
3,4-Dihydroxybenzaldehyde	Phenols
Bisphenol A	Phenols
(S)-4-Hydroxymandelate	Phenols
Chenodeoxycholic acid	Steroids and steroid derivatives
11b,17a,21-Trihydroxypreg-nenolone	Steroids and steroid derivatives
Progesterone	Steroids and steroid derivatives
17a-Estradiol	Steroids and steroid derivatives
20-Hydroxyecdysone	Steroids and steroid derivatives
Androsterone	Steroids and steroid derivatives
19-Oxotestosterone	Steroids and steroid derivatives
Corticosterone	Steroids and steroid derivatives
dienogest	Steroids and steroid derivatives
11b-Hydroxyandrost-4-ene-3,17-dione	Steroids and steroid derivatives
7a-Hydroxyandrost-4-ene-3,17-dione	Steroids and steroid derivatives
Nandrolone	Steroids and steroid derivatives
Cortisol	Steroids and steroid derivatives
Adrenosterone	Steroids and steroid derivatives
Chenodeoxycholic acid glycine conjugate	Steroids and steroid derivatives
2-Methoxy-17beta-estradiol	Steroids and steroid derivatives
Exemestane	Steroids and steroid derivatives
21-Deoxycortisol	Steroids and steroid derivatives
(10S)-Juvenile hormone III diol	Terpenoids
(1S,2R,4S)-(-)-Bornyl acetate	Terpenoids
Xanthoxic acid	Terpenoids
Abscisic alcohol	Terpenoids
2-trans,6-trans-Farnesal	Terpenoids
Illudin M	Terpenoids
Illudin S	Terpenoids
Qing Hau Sau	Terpenoids
Capsidiol	Terpenoids
